# Supplementary material
Source: Springer Nature journal article supplement (https://www.springermedizin.de/resource/supplementary/12882_2013_746_MOESM6_ESM.pdf/9454632)

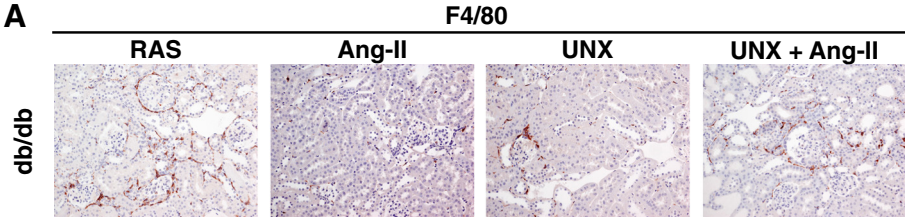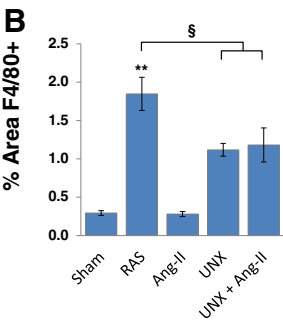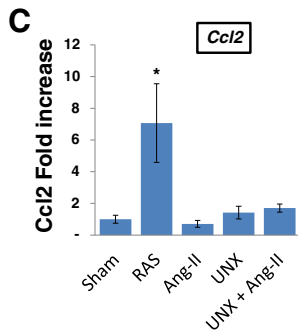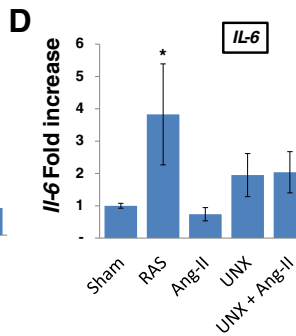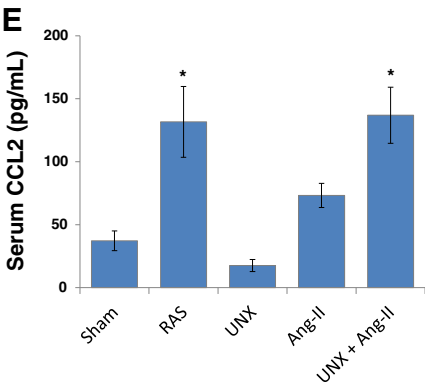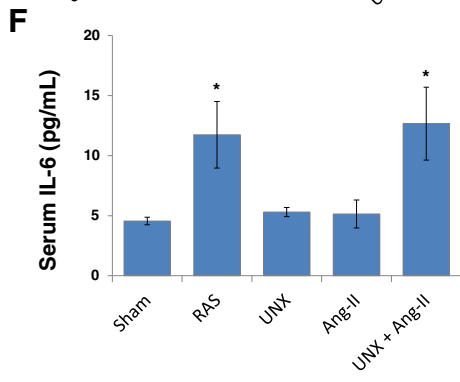

Supplement: MOESM6 [file 9454632]
